## RETRACTION

# The role of specific PP2A complexes in the dephosphorylation of $\gamma$ H2AX

Liping Chen, Yandong Lai, Xiaonian Zhu, Lu Ma, Qing Bai, Iria Vazquez, Yongmei Xiao, Caixia Liu, Daochuan Li, Chen Gao, Zhini He, Xiaowen Zeng, Xiumei Xing, Zhengbao Zhang, Jie Li, Bo Zhang, Qing Wang, Anna A. Sablina, William C. Hahn and Wen Chen

Retraction of: *J. Cell Sci.* doi: 10.1242/jcs.147223.

The authors wish to retract the above online paper. After it was brought to our attention by *Journal of Cell Science*, we identified that the data presented in Fig. 1C, Fig. 2D and Fig. 4A in the manuscript were inappropriately modified with cells and/or nuclei primarily moved within the presented fields, accompanied by trimming of the edges of cells. These manipulations are in breach of the image manipulation policy of *Journal of Cell Science*. Although these modifications were not found to affect the conclusions drawn from the original data, after re-examination of the raw data and recalculation of the values by an internal panel appointed by the institutional Office of Research Integrity, we decided to retract this article. L.C. regrets the inappropriate figure manipulations, of which her co-authors were completely unaware.

We sincerely apologise to the scientific community for adverse consequences resulting from the publication of these data.
